# Supplementary material for: Foley catheter vs. oral misoprostol to induce labour among hypertensive women in India: a cost‐consequence analysis alongside a clinical trial
Source: PubMed Central journal article supplement (PMC6282740; doi:10.1111/1471-0528.15285), 2018-06-22
Supplement: BJO-125-1734-s002.pdf [file BJO-125-1734-s002.pdf]

**Table S1.** Unit costs of healthcare resource utilisation

| Item                                                               | Cost (2016 INR) | Cost (2016 USD) |
|--------------------------------------------------------------------|-----------------|-----------------|
| Induction                                                          |                 |                 |
| Foley catheterisation                                              | 117.93          | 6.84            |
| Oral misoprostol (25mcg)                                           | 4.08            | 0.24            |
| Oxytocin (1ml/5U)                                                  | 23.91           | 1.39            |
| Magnesium Sulphate (1g/2ml)                                        | 11.74           | 0.68            |
| Saline (500ml)                                                     | 27.17           | 1.58            |
| Ringer's lactate (500ml)                                           | 43.48           | 2.5             |
| Intravenous cannula                                                | 14.13           | 0.82            |
| Regular drip infusion set                                          | 54.35           | 3.16            |
| Hypodermic needle                                                  | 4.35            | 0.25            |
| Inpatient                                                          |                 |                 |
| Indoor (per day)                                                   | 21.74           | 1.26            |
| Food (per day)                                                     | 10.87           | 0.63            |
| General ward nursing (per day)                                     | 108.69          | 6.31            |
| Delivery & theatre Vaginal delivery                                | 434.76          | 25.25           |
| Operative vaginal (Forceps)                                        | 217.38          | 12.62           |
| Artificial rupture of membranes                                    | 217.38          | 12.62           |
| Minor procedure: perineal injury repair, repair of perineal trauma | 217.38          | 12.62           |
| Manual removal of placenta                                         | 217.38          | 12.62           |
| Caesarean section                                                  | 1086.91         | 63.12           |
| Epidural analgesia                                                 | 815.18          | 47.34           |
| Local anaesthesia                                                  | 217.38          | 12.62           |
| Critical care costs                                                |                 |                 |
| Oxygen administration (per day)                                    | 108.69          | 6.31            |
| Ventilator (per day)                                               | 217.38          | 12.62           |
| Intensive care unit (per day)                                      | 217.38          | 12.62           |
| Special care baby unit (per day)                                   | 217.38          | 12.62           |
| Blood transfusion                                                  | 489.11          | 28.4            |
| Platelet transfusion                                               | 489.11          | 28.4            |
| Plasma transfusion                                                 | 489.11          | 28.4            |
| Anti-hypertensives Aldomet (250mg)                                 | 3.59            | 0.21            |
| Amlokind (2.5mg)                                                   | 4.35            | 0.25            |
| Aten (50mg)                                                        | 2.39            | 0.14            |
| Labetalol (100mg)                                                  | 17.39           | 1.01            |
| Nifedipine (10mg)                                                  | 1.63            | 0.09            |
| Antibiotics                                                        |                 |                 |
| Amoxicillin IV (500mg)                                             | 1.30            | 0.08            |
| Ciffran IV (200mg)                                                 | 20.87           | 1.21            |
| Ciffran 500MD                                                      | 2.61            | 0.15            |
| Metrodinazole IV (400mg)                                           | 15.98           | 0.93            |
| Ofloxacin + Ornidazole                                             | 4.67            | 0.27            |
| Taxim IV (1g)                                                      | 30.87           | 1.79            |
| Analgaesics                                                        |                 |                 |
| Paracetamol (500mg)                                                | 0.82            | 0.05            |

|                                        |       |      |
|----------------------------------------|-------|------|
| Anti-spasmodics Drotin<br>IV           | 15.54 | 0.9  |
| Epidocin IV                            | 13.59 | 0.79 |
| Nutritional supplements Hovit<br>drops | 26.09 | 1.51 |
| Hovit syrup                            | 26.09 | 1.51 |
| Ossopan syrup                          | 50.00 | 2.9  |

---
