# Supplementary material for: Foley catheter vs. oral misoprostol to induce labour among hypertensive women in India: a cost‐consequence analysis alongside a clinical trial
Source: PubMed Central journal article supplement (PMC6282740; doi:10.1111/1471-0528.15285), 2018-06-22
Supplement: BJO-125-1734-s003.pdf [file BJO-125-1734-s003.pdf]

**Table S2.** Comparison of healthcare costs for Foley catheterisation and oral Misoprostol 25mcg

|                                            | Induction (\$USD) |      | Delivery (\$USD) |      | Hospital Stay (\$USD) |      | Neonatal (\$USD) |      | Total (\$USD)              |                            |
|--------------------------------------------|-------------------|------|------------------|------|-----------------------|------|------------------|------|----------------------------|----------------------------|
|                                            | Foley             | Miso | Foley            | Miso | Foley                 | Miso | Foley            | Miso | Foley                      | Miso                       |
| <i>Gestational Age</i>                     |                   |      |                  |      |                       |      |                  |      |                            |                            |
| <32 weeks (n=5)                            | 34.9              | 10.5 | 46.2             | 25.2 | 59.3                  | 55.4 | 36.5             | 62.2 | 176.9 [95% CI 118.6-231.8] | 153.4 [95% CI 114.8-194.8] |
| 32-36 weeks (n=120)                        | 27.8              | 14.3 | 49.5             | 47.7 | 69.1                  | 53.2 | 23.1             | 10.1 | 169.3 [95% CI 141.8-199]   | 125.4 [95% CI 110.4-139.9] |
| 37+ weeks (n=476)                          | 25.6              | 12.9 | 53.5             | 51.3 | 48.4                  | 46.2 | 1.2              | 4.3  | 128.7 [95% CI 125.0-132.4] | 114.6 [95% CI 109.9-119.6] |
| <i>Bishop's Score at Time of Induction</i> |                   |      |                  |      |                       |      |                  |      |                            |                            |
| ≥3 (n=514)                                 | 25.5              | 12.7 | 51.7             | 50.1 | 48.7                  | 46.1 | 3.3              | 4.9  | 129.2 [95% CI 124.3-133.1] | 113.9 [95% CI 107.8-118]   |
| <3 (n=84)                                  | 29.3              | 16.2 | 57.9             | 52.0 | 71.7                  | 58.7 | 17.9             | 12.4 | 176.8 [95% CI 136.4-213.1] | 139.2 [95% CI 124.4-152.4] |
| <i>Study Recruitment Site</i>              |                   |      |                  |      |                       |      |                  |      |                            |                            |
| GMC (n=300)                                | 29.6              | 15.4 | 51.9             | 49.9 | 57.8                  | 50.1 | 8.8              | 5.1  | 148.1 [95% CI 136.4-165.6] | 120.6 [95% CI 114.4-128.7] |
| Daga (n=301)                               | 22.6              | 10.9 | 53.4             | 50.8 | 46.9                  | 45.4 | 2.4              | 6.7  | 125.3 [95% CI 121.2-129.9] | 113.9 [95% CI 106.7-119.6] |
